# Supplementary material for: How Has COVID-19 Affected Mental Health and Lifestyle Behaviors after 2 Years? The Third Step of a Longitudinal Study of Italian Citizens
Source: MDPI journal article supplement (doi:10.3390/ijerph20010759), 2022-12-31
Supplement: s1 [file s1]

# Supplementary Material

**Table S1.** Descriptive Statistics of the Sample ( $N = 268$ ).

| Characteristic                               | Group                    | <i>N</i> (%) |
|----------------------------------------------|--------------------------|--------------|
| Gender                                       | Female                   | 213 (89.5%)  |
|                                              | Male                     | 55 (20.5%)   |
| Age                                          |                          |              |
| M (SD)                                       | 37.68 (12.91)            | 268 (100%)   |
| Min–Max                                      | 21–73                    |              |
| Education                                    | Primary school           | 1 (0.4%)     |
|                                              | Middle school diploma    | 4 (1.5%)     |
|                                              | High school diploma      | 62 (23.1%)   |
|                                              | Graduate                 | 127 (47.4%)  |
|                                              | Postgraduate             | 74 (27.6%)   |
| Occupation                                   | Employee                 | 133 (49.6%)  |
|                                              | Freelancer               | 56 (20.9%)   |
|                                              | Unemployed               | 26 (9.7%)    |
|                                              | Student                  | 47 (17.5%)   |
|                                              | Retired                  | 6 (2.2%)     |
| Income                                       | 0 €                      | 50 (18.7%)   |
|                                              | <10,000 €                | 44 (16.4%)   |
|                                              | <15,000 €                | 0 (0%)       |
|                                              | <26,000 €                | 0 (0%)       |
|                                              | <55,000 €                | 0 (0%)       |
|                                              | <75,000 €                | 46 (17.2%)   |
|                                              | <120,000 €               | 60 (22.4%)   |
| Marital status                               | ≥120,000 €               | 68 (25.4%)   |
|                                              | Unmarried                | 79 (29.5%)   |
|                                              | Married                  | 67 (25.0%)   |
|                                              | In a relationship        | 110 (41.0%)  |
|                                              | Separated/divorced       | 9 (3.4%)     |
| Child(ren)                                   | Widower                  | 3 (1.1%)     |
|                                              | Yes                      | 92 (34.3%)   |
| if yes:                                      | No                       | 176 (65.7%)  |
|                                              |                          |              |
| M (SD)                                       | 1.69 (0.65)              | 88 (95.7%)   |
| Min–Max                                      | 1–4                      |              |
| Citizenship                                  | Italian                  | 267 (99.6%)  |
|                                              | Foreign                  | 1 (0.4%)     |
| Region of residence                          | North                    | 61 (22.8%)   |
|                                              | Center                   | 141 (52.6%)  |
|                                              | South                    | 66 (24.6%)   |
| COVID-19–independent trauma in the past year | Diagnosis of disease     | 3 (1.1%)     |
|                                              | Dismissal/loss of job    | 48 (17.9%)   |
|                                              | Death of a family member | 162 (60.4%)  |
|                                              | Legal problems           | 4 (1.5%)     |
|                                              | Separation or divorce    | 19 (7.1%)    |
|                                              | Moving city or country   | 6 (2.2%)     |
|                                              | None of the above        | 26 (9.7%)    |
| COVID-19–dependent trauma in the past year   | Diagnosis of disease     | 2 (0.7%)     |
|                                              | Dismissal/loss of job    | 12 (4.5%)    |
|                                              | Death of a family member | 224 (83.6%)  |
|                                              | Legal problems           | 3 (1.1%)     |
|                                              | Separation or divorce    | 3 (1.1%)     |
|                                              | Moving city or country   | 7 (2.6%)     |

|                          |                   |             |
|--------------------------|-------------------|-------------|
|                          | None of the above | 17 (6.3%)   |
| Medical issues:          |                   |             |
| No pathology             | Yes               | 175 (63.3%) |
|                          | No                | 93 (34.7%)  |
| Cardiovascular pathology | Yes               | 12 (4.5%)   |
|                          | No                | 256 (95.5%) |
| Respiratory pathology    | Yes               | 9 (3.4%)    |
|                          | No                | 259 (96.6%) |
| Oncological pathology    | Yes               | 14 (5.2%)   |
|                          | No                | 254 (94.8%) |
| Orthopedic pathology     | Yes               | 17 (6.3%)   |
|                          | No                | 251 (93.7%) |
| Psychiatric pathology    | Yes               | 6 (2.2%)    |
|                          | No                | 262 (97.8%) |
| Other pathology          | Yes               | 49 (18.3%)  |
|                          | No                | 219 (81.7%) |
| Psychotherapy            | Yes               | 93 (34.7%)  |
|                          | No                | 175 (63.3%) |
| Psychopharmaceuticals    | Yes               | 25 (9.3%)   |
|                          | No                | 243 (90.7%) |

**Table S2.** Containment Measures Introduced in March 2020 and Still Retained.

| Which of the Infection Containment Measures Introduced in March 2020 to Prevent the Spread of COVID-19 Do You Still Follow? | Group | N (%)       |
|-----------------------------------------------------------------------------------------------------------------------------|-------|-------------|
| Avoid hugs                                                                                                                  | Yes   | 96 (35.8%)  |
|                                                                                                                             | No    | 156 (56.0%) |
| Avoid handshakes                                                                                                            | Yes   | 115 (42.9%) |
|                                                                                                                             | No    | 131 (48.9%) |
| Maintain a distance of at least 1 meter from others                                                                         | Yes   | 103 (38.4%) |
|                                                                                                                             | No    | 143 (53.4%) |
| Avoid places where there are crowds                                                                                         | Yes   | 153 (57.1%) |
|                                                                                                                             | No    | 93 (34.7%)  |
| Wash (or disinfect with alcohol-based gel) hands often outside the home                                                     | Yes   | 207 (77.2%) |
|                                                                                                                             | No    | 39 (14.6%)  |
| Avoid touching face with hands                                                                                              | Yes   | 145 (54.1%) |
|                                                                                                                             | No    | 101 (37.7%) |
| Sneeze or cough using a handkerchief or elbow                                                                               | Yes   | 209 (78.0%) |
|                                                                                                                             | No    | 37 (13.8%)  |
| Use masks in enclosed spaces                                                                                                | Yes   | 163 (60.8%) |
|                                                                                                                             | No    | 83 (31.0%)  |

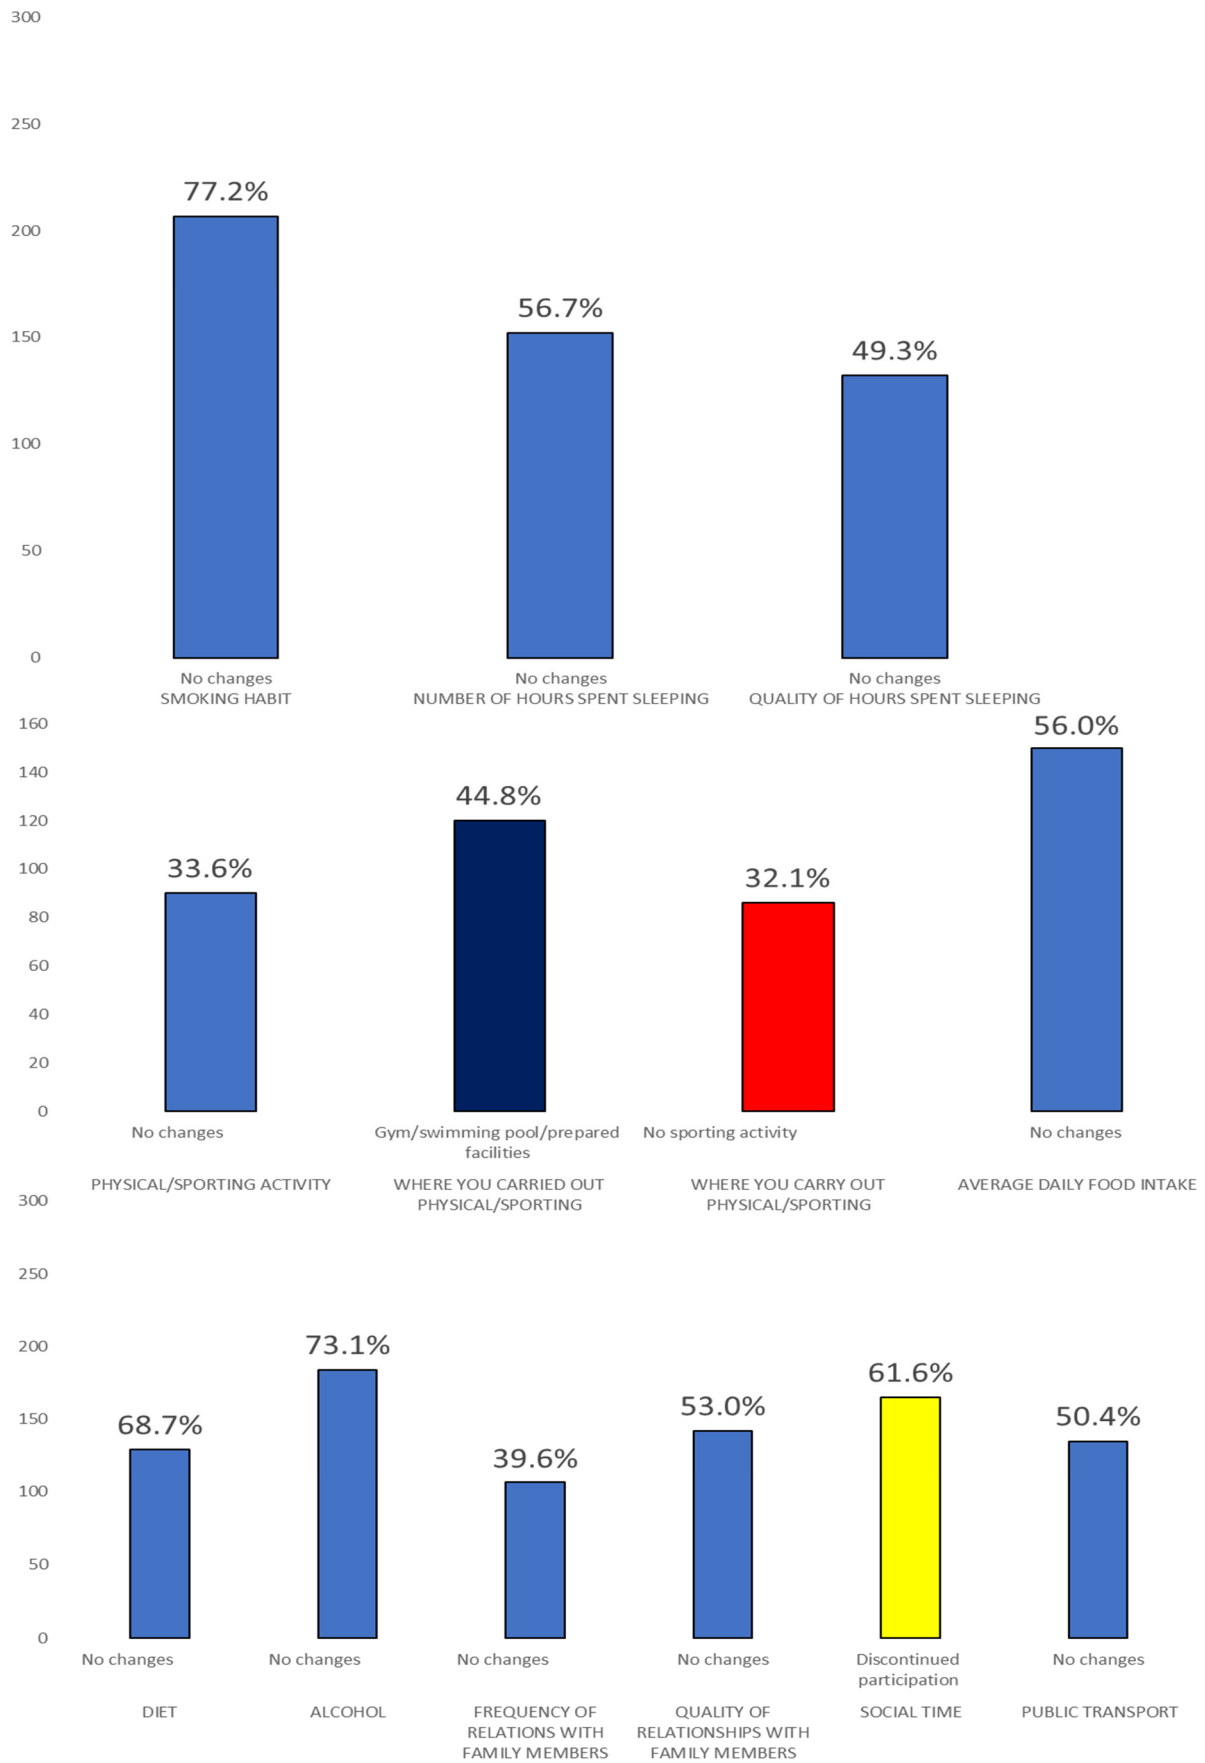

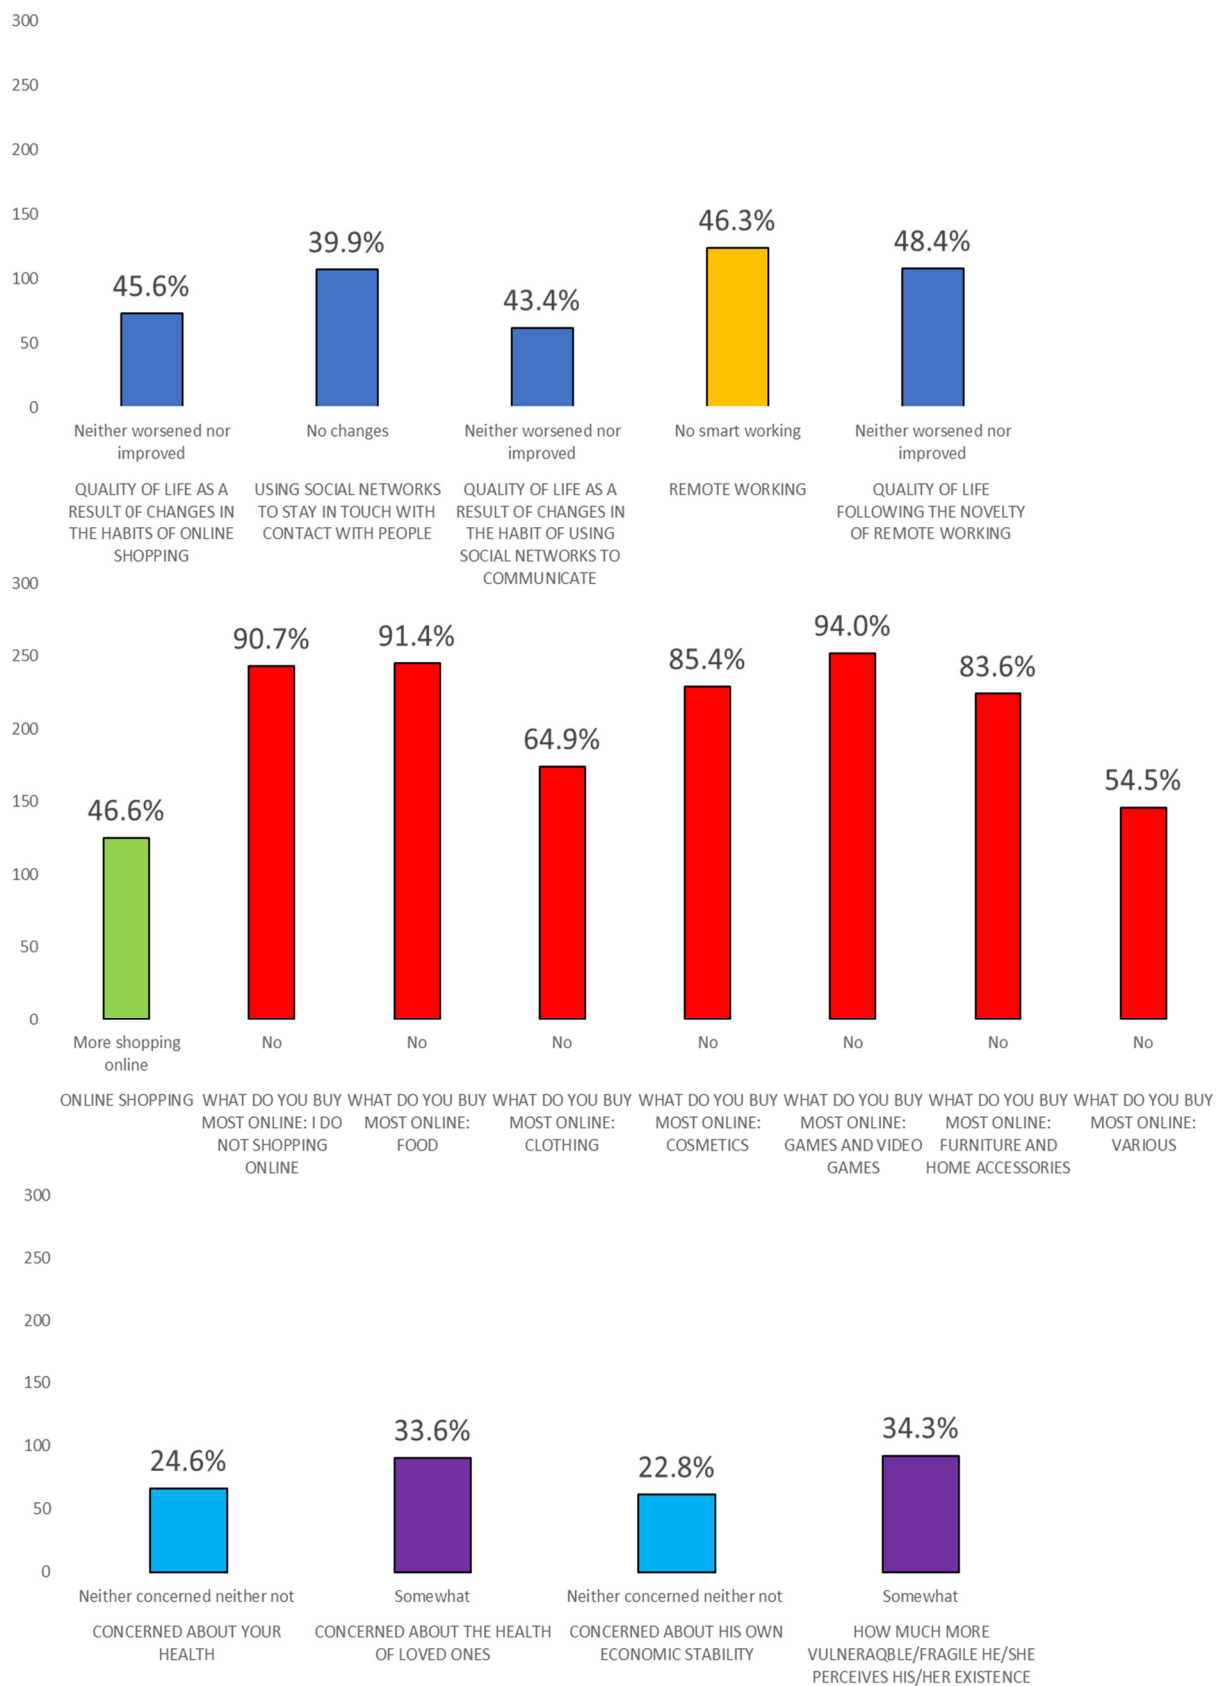

**Figure S1.** Prevailing Modes of Lifestyle Variables.
